# Supplementary material for: Multiple stimuli-responsive selenium-functionalized biodegradable starch-based hydrogels
Source: Royal Society of Chemistry journal article supplement (doi:10.1039/c7sm02137b), 2017-12-20
Supplement: c7sm02137b1.pdf [file c7sm02137b1.pdf]

## **Multiple stimuli-responsive selenium-functionalized biodegradable starch-based hydrogels**

Tongbing Sun<sup>a,b</sup>, Caizhen Zhu<sup>a\*</sup>, Jian Xu<sup>b\*</sup>

<sup>a</sup> College of Chemical and Environmental Engineering, Shenzhen University, Shenzhen, Guangdong Province, China.

<sup>b</sup> Beijing National Laboratory for Molecular Sciences, Institute of Chemistry, Chinese Academy of Sciences, Zhongguancun North First Street 2, Beijing, China.

***E-mail:*** *czzhu@szu.edu.cn, jxu@iccas.ac.cn*

***Tel:*** *+86 10 82619667*

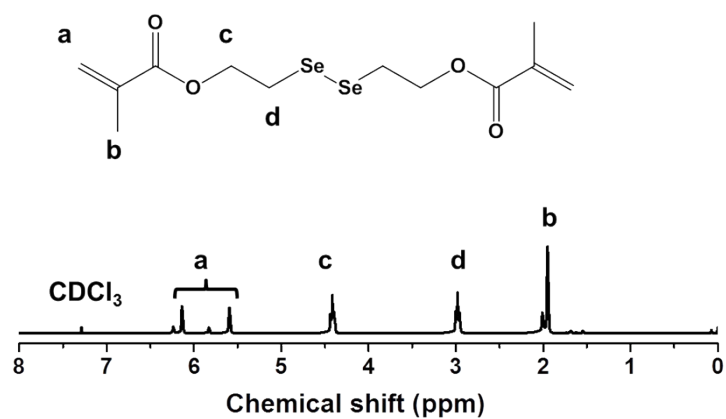

Fig. S1  $^1\text{H}$ -NMR spectrum of di(ethylene methacrylate) diselenide.

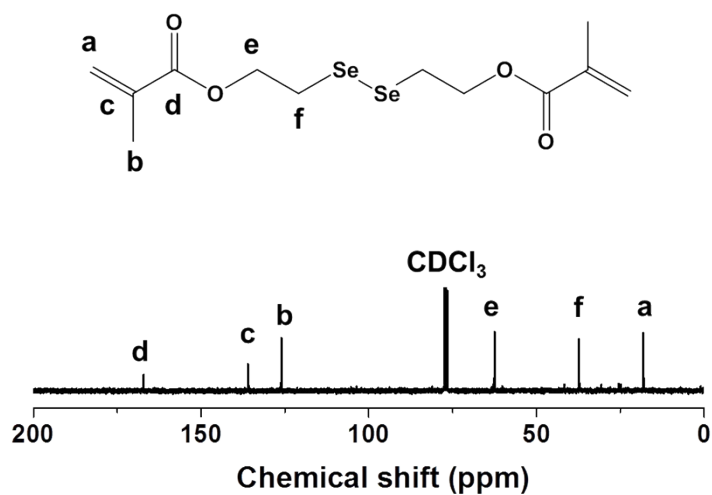

Fig. S2  $^{13}\text{C}$ -NMR spectrum of di(ethylene methacrylate) diselenide.

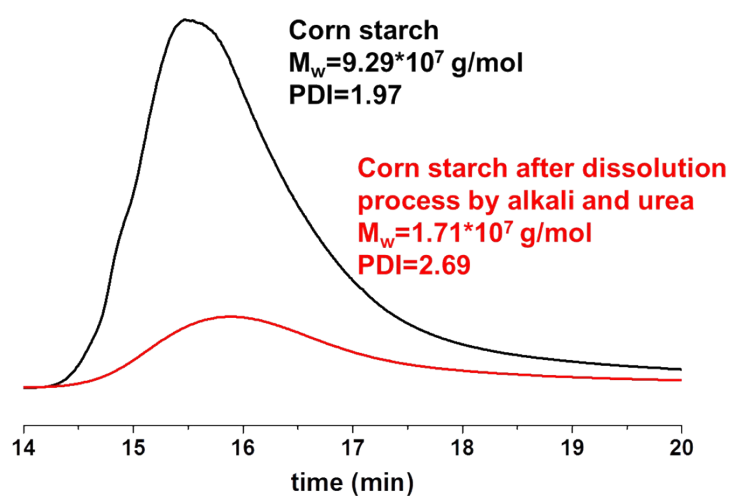

Fig. S3 GPC results of the pristine core starch and the dissolved core starch by alkali and urea system.

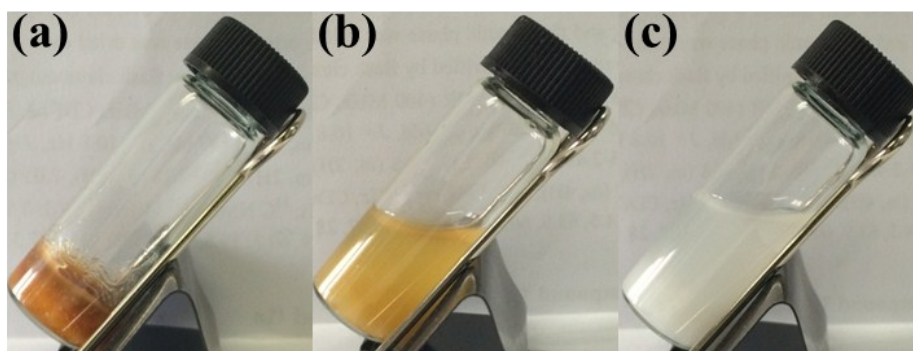

**Fig. S4** The optical pictures of starch-based hydrogels (a), and the hydrogels after the reduction by 50 mM DTT solution (b) and after the oxidation by 0.1 wt% H<sub>2</sub>O<sub>2</sub> solution (c), respectively.

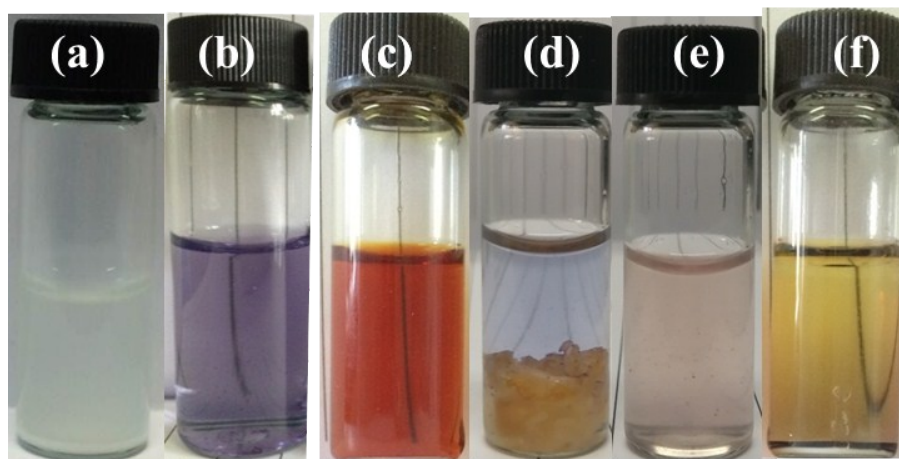

**Fig. S5** Optical pictures of starch (a), iodine reaction of starch before (b) and after the addition of  $\alpha$ -amylase solution for 24 hrs (c), iodine reaction of starch-based hydrogels before (d) and after the addition of  $\alpha$ -amylase solution for 12 hrs (e) and 24 hrs (f).

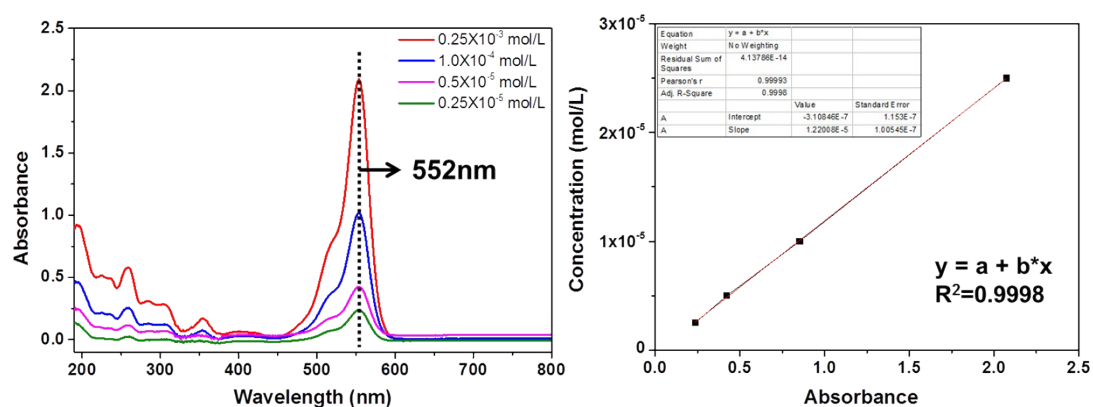

**Fig. S6** The calibration curve of the absorbance intensity at the wavelength of 552 nm and different concentrations of RB solutions.

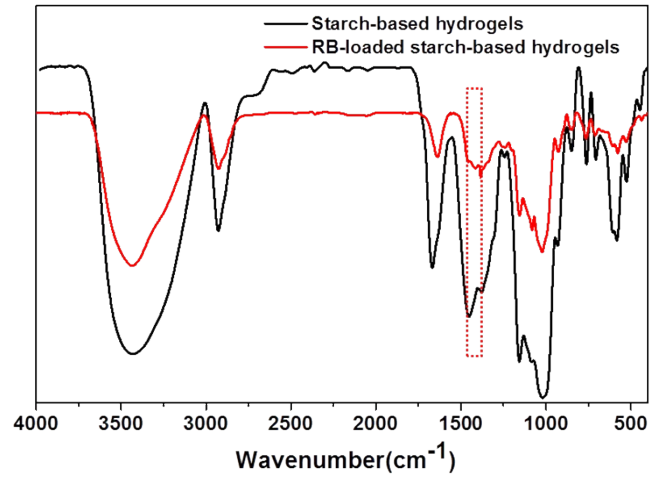

**Fig. S7** FT-IR spectra of starch-based hydrogels and RB-loaded starch-based hydrogels

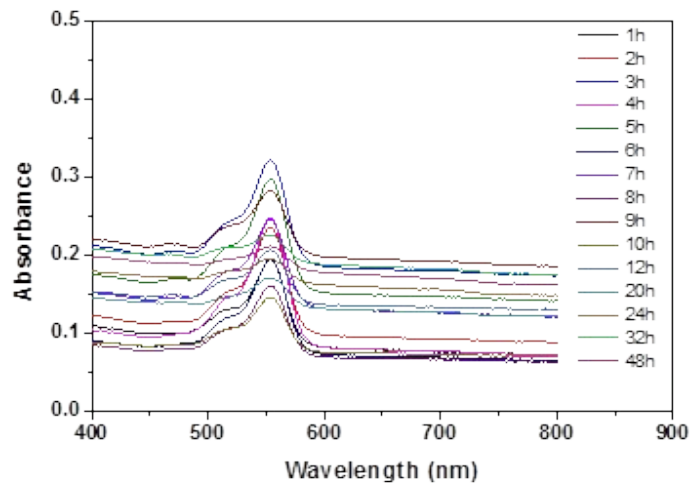

**Fig. S8** Blank test of UV-vis spectra of RB released from starch-based hydrogels at different periods.

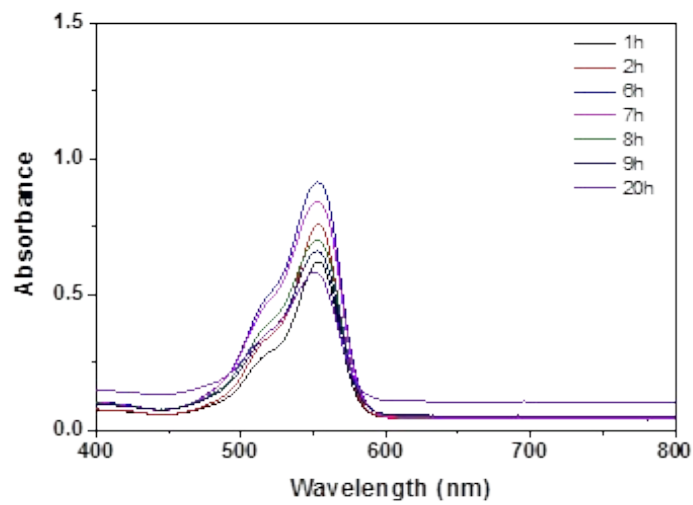

**Fig. S9** UV-vis spectra of RB released from starch-based hydrogels after the oxidation at different periods.

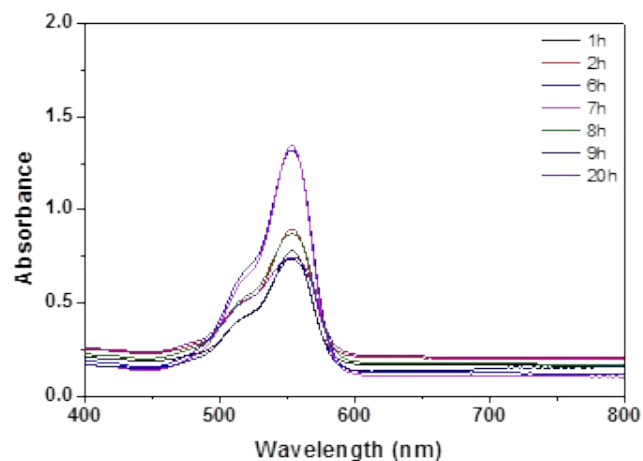

**Fig. S10** UV-vis spectra of RB released from starch-based hydrogels after the reduction at different periods.

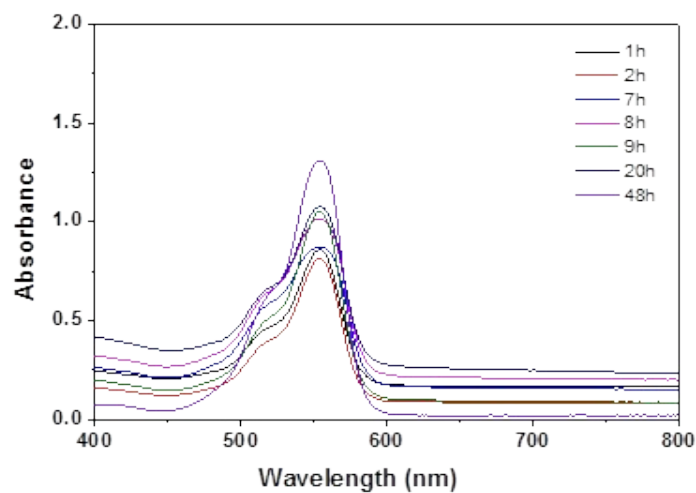

**Fig. S11** UV-vis spectra of RB released from starch-based hydrogels at different enzymatic hydrolysis periods.

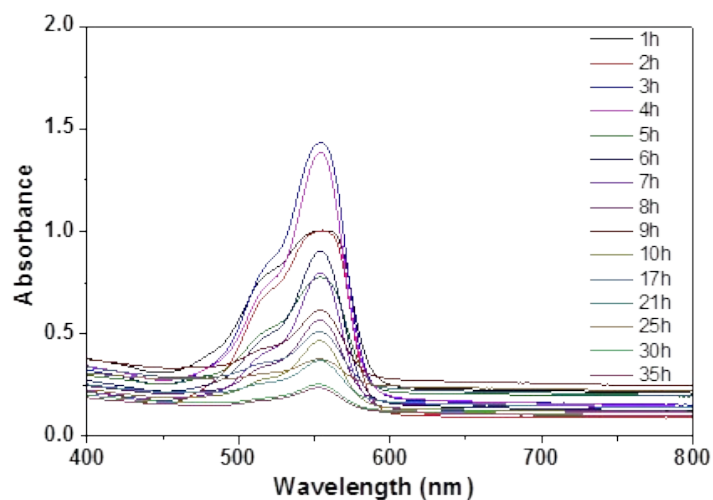

**Fig. S12** UV-vis spectra of RB released from starch-based hydrogels under the mixture of  $\alpha$ -amylase and DTT solutions at different periods.

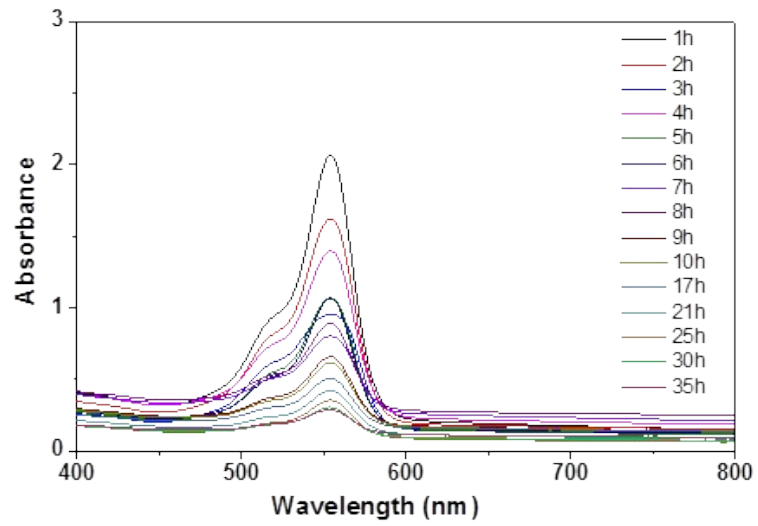

**Fig. S13** UV-vis spectra of RB released from starch-based hydrogels under the mixture of  $\alpha$ -amylase and  $H_2O_2$  solutions at different periods.
